# Supplementary material for: MnMoO4-S nanosheets with rich oxygen vacancies for high-performance supercapacitors
Source: Royal Society of Chemistry journal article supplement (doi:10.1039/d2na00148a), 2022-01-01
Supplement: d2na00148a1.pdf [file d2na00148a1.pdf]

## **Supporting Information**

### **MnMoO<sub>4</sub>-S nanosheets with rich oxygen vacancies for high-performance supercapacitors**

**Hao Fu, Meixin Wang, Qing Ma, Mingwen Wang, Xiping Ma,**

**Yaping Ye\***

**Beijing Key Laboratory for Science and Application of Functional Molecular  
and Crystalline Materials, University of Science and Technology Beijing, Beijing  
100083, China**

\*Corresponding author. Tel.: +8613651330863

E-mail address: [yypfree@sas.ustb.edu.cn](mailto:yypfree@sas.ustb.edu.cn)

Table S 1 Elements distribution of the overall surface, flower composed of nanosheets and  
nanocone of MnMoO<sub>4</sub>-S

|         | overall |         | flower |         | nanocone |         |
|---------|---------|---------|--------|---------|----------|---------|
| Element | Atom%   | Weight% | Atom%  | Weight% | Atom%    | Weight% |
| O       | 0.48    | 46.67   | 0.15   | 49.25   | 0.19     | 39.87   |
| S       | 0.02    | 2.30    | 0.01   | 3.73    | 0.11     | 24.90   |
| Mn      | 0.13    | 22.72   | 0.03   | 19.42   | 0.04     | 12.46   |
| Mo      | 0.15    | 28.31   | 0.04   | 27.59   | 0.07     | 22.77   |

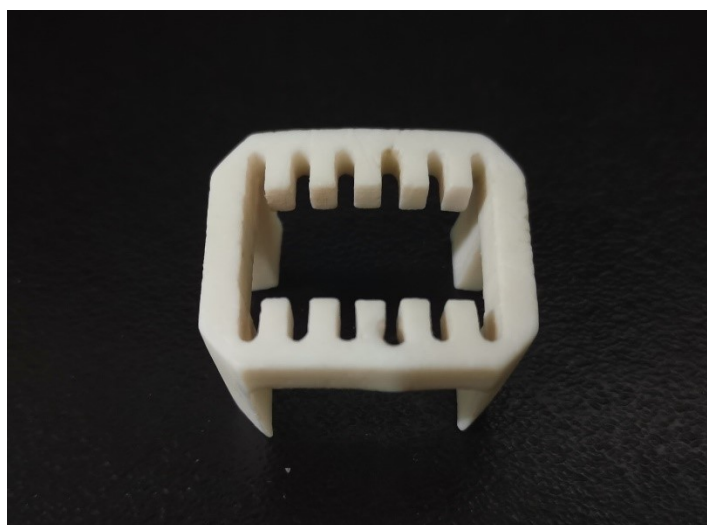

Fig.S1. A custom teflon shelf that holds six pieces of Ni foam

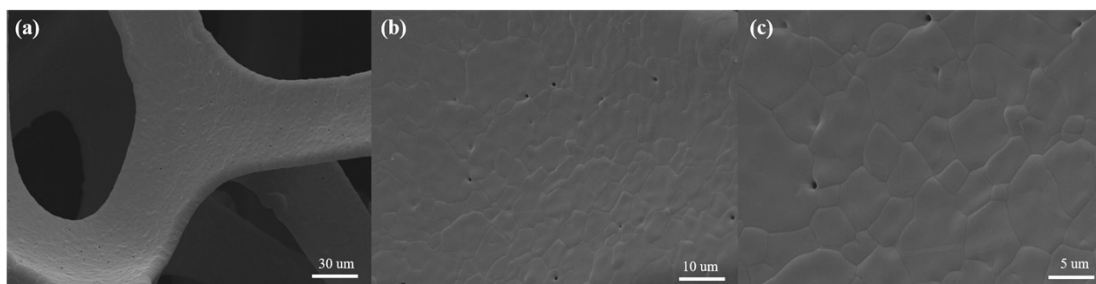

Fig.S2.SEM of Ni foam pretreated by 3M HCl in different magnification

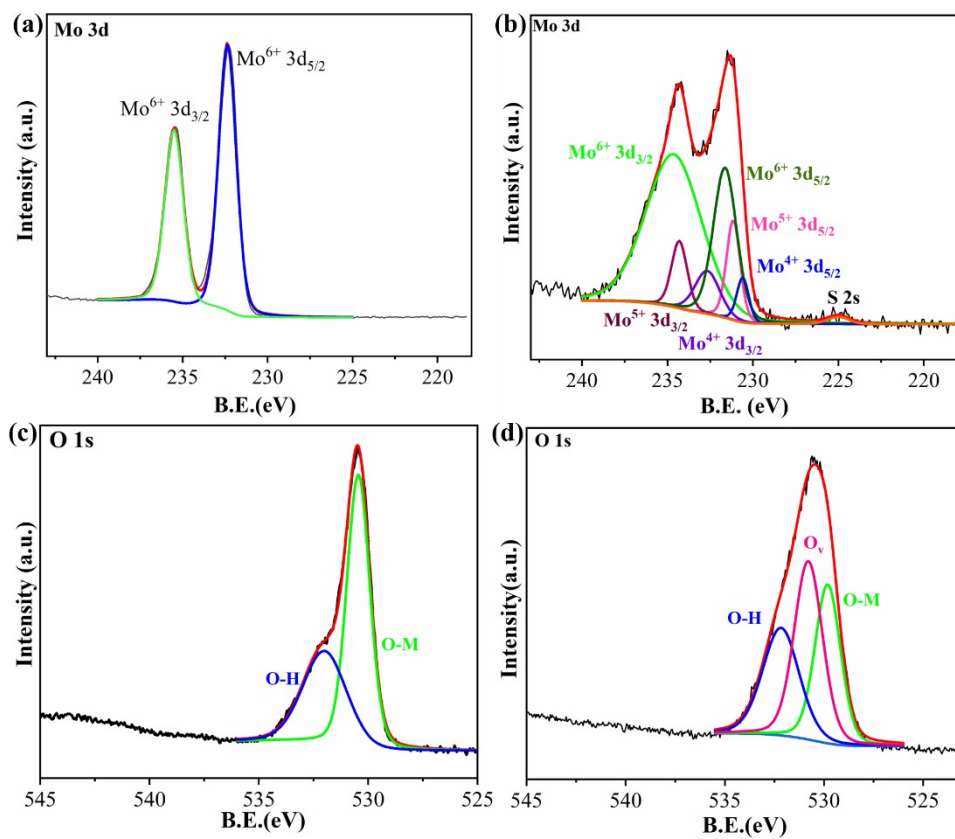

Fig.S3. XPS spectra of Mo 3d orbits of (a)MnMoO<sub>4</sub>;(b) MnMoO<sub>4</sub>-S, O 1s orbits of (c)MnMoO<sub>4</sub>;(d)

MnMoO<sub>4</sub>-S,

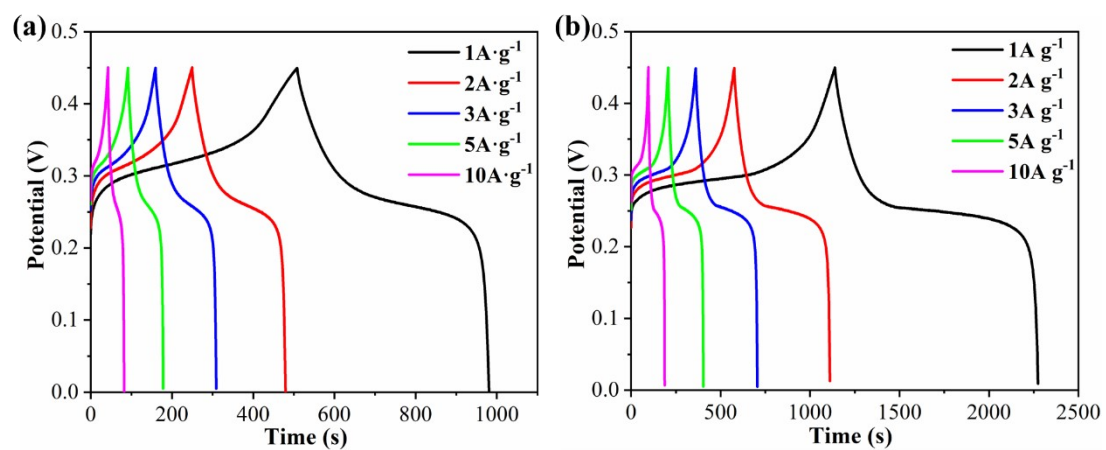

Fig.S4. CV curves of (a)MnMoO<sub>4</sub>;(b) MnMoO<sub>4</sub>-S
